# Supplementary material for: Information given by websites selling home self-sampling COVID-19 tests: an analysis of accuracy and completeness
Source: PubMed Central journal article supplement (PMC7650079; doi:10.1136/bmjopen-2020-042453), 2020-11-06
Supplement: bmjopen-2020-042453supp001.pdf [file bmjopen-2020-042453supp001.pdf]

**Supplementary Table 1: Characteristics of included websites and COVID-19 tests**

| Name of company                                              | Type of company                           | Type of test | Name of test manufacturer     | Home testing or home sampling | Regulatory approval CE/EUA or *endorsement |
|--------------------------------------------------------------|-------------------------------------------|--------------|-------------------------------|-------------------------------|--------------------------------------------|
| Superdrug <sup>40</sup>                                      | Pharmacy                                  | Antibody     | Not Reported                  | Home sampling                 | -                                          |
| CityDoc <sup>14</sup>                                        | Private health clinic                     | Antibody     | Not Reported                  | Home sampling                 | -                                          |
|                                                              |                                           | Molecular    | Not Reported                  | Home sampling                 | -                                          |
| Rightangled Healthcare <sup>22</sup>                         | Online testing specialist                 | Molecular    | Primerdesign Ltd              | Home sampling                 | -                                          |
| Randox <sup>23</sup>                                         | Laboratory                                | Molecular    | Randox PCR test               | Home sampling                 | -                                          |
| Samedaydoctor <sup>24</sup>                                  | Private health clinic                     | Molecular    | Not Reported                  | Home sampling                 | -                                          |
| Zava <sup>25</sup>                                           | Private health clinic                     | Antibody     | Not Reported                  | Home sampling                 | CE                                         |
|                                                              |                                           | Molecular    | Not Reported                  | Home sampling                 | CE                                         |
| The Online Clinic (Online Clinic (UK) Limited) <sup>26</sup> | Private health clinic                     | Antibody     | Abbott Laboratories and Roche | Home sampling                 | -                                          |
|                                                              |                                           | Molecular    | Not Reported                  | Home sampling                 | CE                                         |
| Doctorcall of Harley Street <sup>15</sup>                    | Private health clinic                     | Antibody     | Not Reported                  | Home sampling                 | CE<br>Endorse UK Government                |
|                                                              |                                           | Molecular    | Not Reported                  | Home sampling                 | CE                                         |
| The Family Planning Association (FPA) <sup>27</sup>          | Online sexual health specialist           | Molecular    | Not Reported                  | Home sampling                 | -                                          |
| YourHealthFirst Clinic: Harley Street <sup>38</sup>          | Private health clinic                     | Antibody     | Not Reported                  | Home testing                  | CE                                         |
| Antibody Solutions <sup>28</sup>                             | Company specialising in beauty treatments | Antibody     | Not Reported                  | Home sampling                 | -                                          |
|                                                              |                                           | Molecular    | Not Reported                  | Home sampling                 | Endorse PHE, NHS                           |
| MyHealthcare Clinic <sup>29</sup>                            | Private health clinic                     | Antibody     | Abbott                        | Home sampling                 | Endorse PHE                                |
|                                                              |                                           | Molecular    | Not Reported                  | Home sampling                 | -                                          |
| MedExpress <sup>30</sup>                                     | Pharmacy                                  | Molecular    | Not Reported                  | Home sampling                 | -                                          |
| Summerfield Healthcare <sup>16</sup>                         | Private health clinic                     | Antibody     | Epitope Diagnostics inc (EDI) | Home sampling                 | -                                          |
|                                                              |                                           | Molecular    | Not Reported                  | Home sampling                 | -                                          |
| Atruchecks Limited <sup>31</sup>                             | Online test supplier                      | Antibody     | Abbott                        | Home sampling                 | Endorse PHE                                |
|                                                              |                                           | Molecular    | Not Reported                  | Home sampling                 | -                                          |
| PillDoctor <sup>32</sup>                                     | Pharmacy                                  | Antibody     | Not Reported                  | Home sampling                 | -                                          |
|                                                              | Pharmacy                                  | Molecular    | Not Reported                  | Home sampling                 | Endorse UK Government                      |
| London Medical Laboratory <sup>33</sup>                      | Laboratory                                | Antibody     | Abbott                        | Home sampling                 | CE<br>Endorse PHE                          |
|                                                              |                                           | Molecular    | Not Reported                  | Home sampling                 | CE<br>Endorse PHE                          |
| WebMed Pharmacy <sup>34</sup>                                | Pharmacy                                  | Antibody     | Not Reported                  | Home sampling                 | CE<br>Endorse PHE                          |
|                                                              |                                           | Molecular    | Not Reported                  | Home sampling                 | Endorse PHE                                |

| Name of company                            | Type of company                 | Type of test | Name of test manufacturer            | Home testing or home sampling | Regulatory approval CE/EUA or *endorsement |
|--------------------------------------------|---------------------------------|--------------|--------------------------------------|-------------------------------|--------------------------------------------|
| Babylon <sup>39</sup>                      | Private health clinic           | Antibody     | Not Reported                         | Home sampling                 | -                                          |
| Medichecks <sup>37</sup>                   | Online test specialist          | Antibody     | Not Reported                         | Home sampling                 | CE                                         |
| LondonDoctorsClinic <sup>17</sup>          | Private health clinic           | Molecular    | Not Reported                         | Home sampling                 | Endorse PHE, NHS, UK Government            |
| Blue Horizon Medicals <sup>18</sup>        | Online test specialists         | Antibody     | Not Reported                         | Home sampling                 | Endorse PHE                                |
|                                            |                                 | Molecular    | Not Reported                         | Home sampling                 | -                                          |
| better2know <sup>19</sup>                  | Online sexual health specialist | Antibody     | Not Reported                         | Home sampling                 | CE                                         |
|                                            |                                 | Molecular    | Not Reported                         | Home sampling                 | -                                          |
| Private Harley Street Clinic <sup>20</sup> | Private health clinic           | Molecular    | Not Reported                         | Home sampling                 | Endorse PHE                                |
| Qured <sup>21</sup>                        | Private health clinic           | Antibody     | Not Reported                         | Home sampling                 | CE<br>Endorse PHE                          |
|                                            |                                 | Molecular    | Not Reported                         | Home sampling                 | CE                                         |
| LabCorp <sup>35</sup>                      | Laboratory                      | Molecular    | LabCorp (139900)                     | Home sampling                 | EUA                                        |
| Hims Inc <sup>36</sup>                     | Private health clinic           | Molecular    | Rutgers Clinical Genomics Laboratory | Home sampling                 | EUA                                        |

\* Statement that the test is 'used by', 'approved by' or 'compliant with'.

Abbreviations: PHE, Public Health England; EUA, Emergency Use Authorisation

**Supplementary Figure 1: Reported test manufacturer for the 41 tests for sale included in the cohort.**

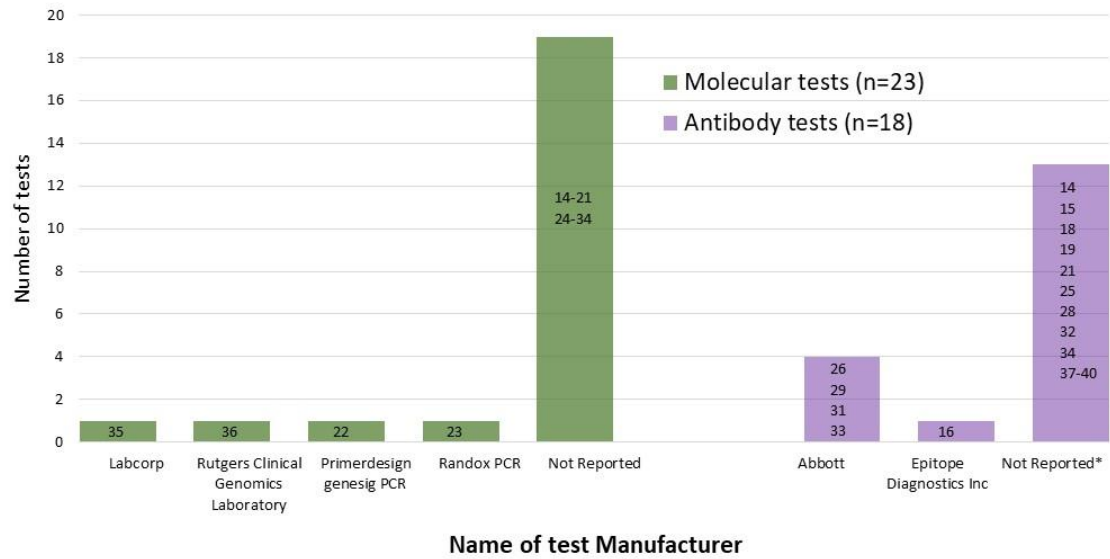

\*7 of 13 'Not reported' antibody tests stated it was a finger prick test with no further detail.
